# Supplementary material
Source: PubMed Central journal article supplement (PMC6705141)
Supplement: jamacardiol-4-1007-s001.pdf [file jamacardiol-4-1007-s001.pdf]

## Supplementary Online Content

Oikonomou EK, Kokkinidis DG, Kampaktis PN, et al. Assessment of prognostic value of left ventricular global longitudinal strain for early prediction of chemotherapy-induced cardiotoxicity: a systematic review and meta-analysis. *JAMA Cardiol*. Published online August 21, 2019. doi:10.1001/jamacardio.2019.2952

**eMethods.** Database search algorithms

**eFigure.** PRISMA flowchart

**eTable 1.** Exclusion criteria for studies at the full manuscript review stage

**eTable 2.** Summary clinical characteristics of the included study populations

**eTable 3.** Prognostic and discriminatory value of continuous GLS for chemotherapy-induced cardiotoxicity

**eTable 4.** Meta-regression analysis of prognostic odds ratios for threshold GLS changes

**eTable 5.** Quality in Prognostic Studies (QUIPS) risk of bias tool

**eReferences.**

This supplementary material has been provided by the authors to give readers additional information about their work.

## **eMethods.** Database search algorithms

The search algorithms used in this study are presented below. All databases were searched from their inception until June 1<sup>st</sup> 2018. The number of retrieved items is presented next to each database.

### **Search for PubMed (n=217):**

(cardiotoxicity[mh] OR cardiotox\*[tw] OR "heart failure"[mh] OR "heart failure"[tw] OR "ventricular dysfunction"[tw]) AND (chemotherapy[mh] OR chemotherap\*[tw] OR trastuzumab[tw] OR anthracycline[tw] OR doxorubicin[tw] OR adriamycin[tw] OR idarubicin[tw] OR epirubicin[tw] OR daunorubicin[tw] OR mitoxantrone[tw] OR 5-fluorouracil[tw] OR paclitaxel[tw] OR cyclophosphamide[tw]) AND (echocardiography[mh] OR echocardiogr\*[tw] OR ultrasound[tw]) AND (deformation[tw] OR strain[tw])  
NOT ("case reports"[Publication Type] OR "comment"[Publication Type] OR "editorial"[Publication Type])

### **Search for Embase (n=891→864 non-duplicates):**

('cardiotoxicity'/de OR cardiotox\* OR 'heart failure'/de OR 'heart failure' OR 'ventricular dysfunction') AND ('chemotherapy'/de OR chemotherap\* OR trastuzumab OR anthracycline OR doxorubicin OR adriamycin OR idarubicin OR epirubicin OR daunorubicin OR mitoxantrone OR 5-fluorouracil OR paclitaxel OR cyclophosphamide) AND ('echocardiography'/de OR echocardiogr\* OR ultrasound) AND (deformation OR strain)  
limit 2 to (article or article in press or conference paper or letter)

### **Search for Cochrane library (n=36)**

(cardiotoxicity OR cardiotox\* OR "heart failure" OR "ventricular dysfunction")  
AND (chemotherap\* OR trastuzumab OR anthracycline OR doxorubicin OR adriamycin OR idarubicin OR epirubicin OR daunorubicin OR mitoxantrone OR fluorouracil OR paclitaxel OR cyclophosphamide)  
AND (echo\* OR ultrasound)  
AND (deformation OR strain)

### **SCOPUS library (n=1330) – search in all fields**

( ALL ( cardiotoxicity OR cardiotox\* OR "heart failure" OR "ventricular dysfunction" ) AND ALL ( chemotherap\* OR trastuzumab OR anthracycline OR doxorubicin OR adriamycin OR idarubicin OR epirubicin OR daunorubicin OR mitoxantrone OR fluorouracil OR paclitaxel OR cyclophosphamide ) AND ALL ( echo\* OR ultrasound ) AND ALL ( deformation OR strain ) ) AND ( LIMIT-TO ( DOCTYPE , "ar" ) OR LIMIT-TO ( DOCTYPE , "le" ) OR LIMIT-TO ( DOCTYPE , "cp" ) OR LIMIT-TO ( DOCTYPE , "ip" ) )

**eFigure.** PRISMA flowchart

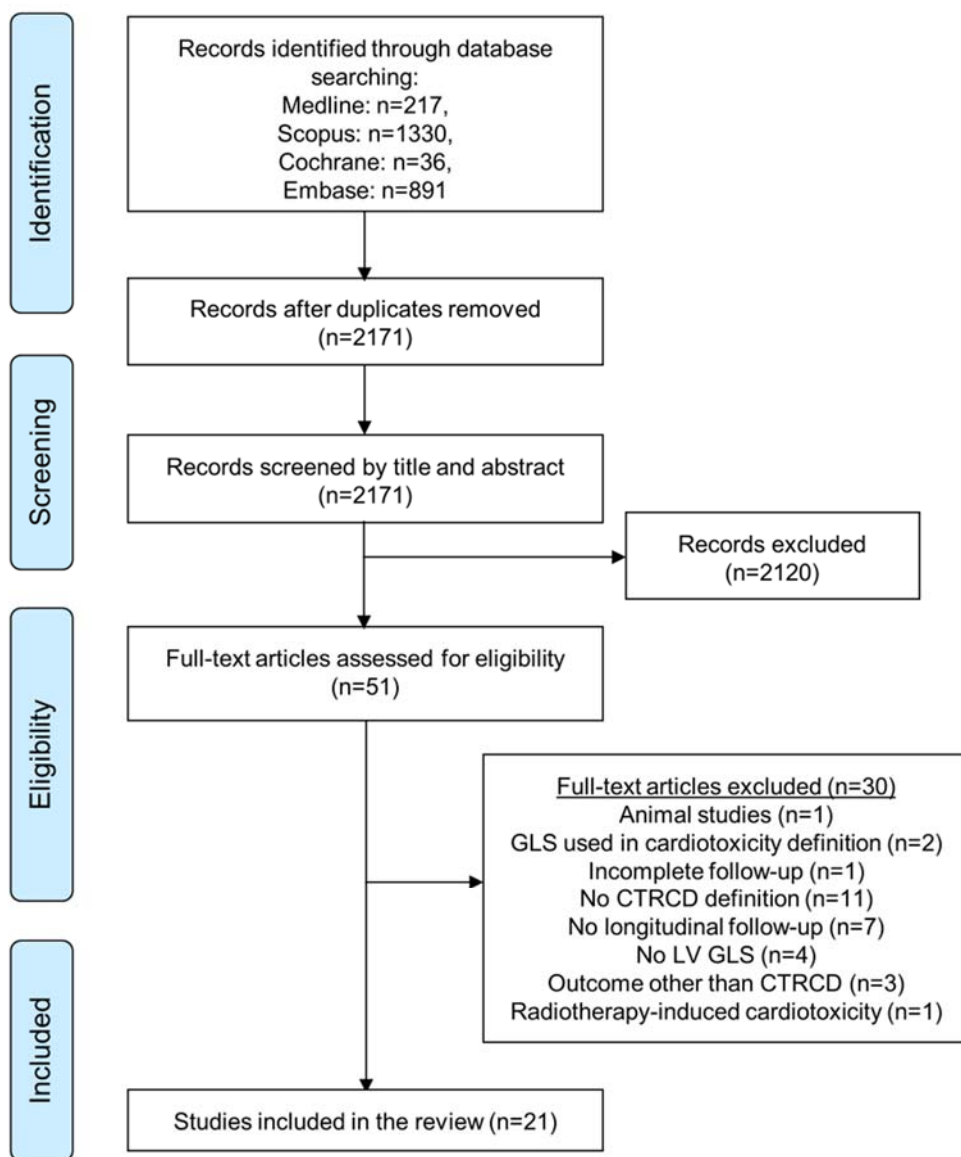

CTRCD: cancer therapy related cardiac dysfunction; (LV) GLS: (left ventricular) global longitudinal strain.

**eTable 1.** Exclusion criteria for studies at the full manuscript review stage

| <b>Serial number</b> | <b>Publication title</b>                                                                                                                                                                                                                                | <b>Reason for exclusion</b> |
|----------------------|---------------------------------------------------------------------------------------------------------------------------------------------------------------------------------------------------------------------------------------------------------|-----------------------------|
| 1                    | Ali MT, et al. Myocardial Strain Is Associated with Adverse Clinical Cardiac Events in Patients Treated with Anthracyclines. <i>J Am Soc Echocardiogr.</i> 2016;29(6):522-527.e523.                                                                     | Outcome other than CTRCD    |
| 2                    | Cardinale D, et al. Early detection of anthracycline cardiotoxicity and improvement with heart failure therapy. <i>Circulation.</i> 2015;131(22):1981-1988.                                                                                             | No LV GLS                   |
| 3                    | Chang WT, et al. The Early Predictive Value of Right Ventricular Strain in Epirubicin-Induced Cardiotoxicity in Patients with Breast Cancer. <i>Acta Cardiol Sin.</i> 2016;32(5):550-559.                                                               | No LV GLS                   |
| 4                    | Christiansen JR, et al. Utility of Global Longitudinal Strain by Echocardiography to Detect Left Ventricular Dysfunction in Long-Term Adult Survivors of Childhood Lymphoma and Acute Lymphoblastic Leukemia. <i>Am J Cardiol.</i> 2016;118(3):446-452. | No longitudinal follow-up   |
| 5                    | de Almeida AL, et al. Subclinical ventricular dysfunction detected by speckle tracking two years after use of anthracycline. <i>Arq Bras Cardiol.</i> 2015;104(4):274-283.                                                                              | No longitudinal follow-up   |
| 6                    | Hare JL, et al. Use of myocardial deformation imaging to detect preclinical myocardial dysfunction before conventional measures in patients undergoing breast cancer treatment with trastuzumab. <i>Am Heart J.</i> 2009;158(2):294-301.                | Incomplete follow-up        |
| 7                    | Ho E, et al. Subclinical anthracycline- and trastuzumab-induced cardiotoxicity in the long-term follow-up of asymptomatic breast cancer survivors: A speckle tracking echocardiographic study. <i>Heart.</i> 2010;96(9):701-707.                        | No CTRCD definition         |
| 8                    | Jassal DS, et al. Utility of Tissue Doppler and Strain Rate Imaging in the Early Detection of Trastuzumab and Anthracycline Mediated Cardiomyopathy. <i>J Am Soc Echocardiogr.</i> 2009;22(4):418-424.                                                  | Animal study                |
| 9                    | Jurcut R, et al. Strain rate imaging detects early cardiac effects of pegylated liposomal Doxorubicin as adjuvant therapy in elderly patients with breast cancer. <i>J Am Soc Echocardiogr.</i> 2008;21(12):1283-1289.                                  | No CTRCD definition         |
| 10                   | Kang Y, et al. Early detection of anthracycline-induced cardiotoxicity using two-dimensional speckle tracking echocardiography. <i>Cardiol J.</i> 2013;20(6):592-599.                                                                                   | No CTRCD definition         |

|    |                                                                                                                                                                                                                                                                                         |                           |
|----|-----------------------------------------------------------------------------------------------------------------------------------------------------------------------------------------------------------------------------------------------------------------------------------------|---------------------------|
| 11 | Kang Y, et al. Subclinical anthracycline-induced cardiotoxicity in the long-term follow-up of lymphoma survivors: A multi-layer speckle tracking analysis. <i>Arq Bras Cardiol.</i> 2018;110(3):219-228.                                                                                | No longitudinal follow-up |
| 12 | Lorenzini C, et al. Reliability of Left Ventricular Ejection Fraction from Three-Dimensional Echocardiography for Cardiotoxicity Onset Detection in Patients with Breast Cancer. <i>J Am Soc Echocardiogr.</i> 2017;30(11):1103-1110.                                                   | No longitudinal follow-up |
| 13 | Mavinkurve-Groothuis AM, et al. Myocardial 2D strain echocardiography and cardiac biomarkers in children during and shortly after anthracycline therapy for acute lymphoblastic leukaemia (ALL): a prospective study. <i>Eur Heart J Cardiovasc Imaging.</i> 2013;14(6):562-569.        | No CTRCD definition       |
| 14 | Mirzaee F, et al. Speckle tracking echocardiography for detection of early myocardial changes in patients treated with anthracyclines. <i>Int Cardiovasc Res J.</i> 2017;11(2):55-59.                                                                                                   | No CTRCD definition       |
| 15 | Mousavi N, et al. Echocardiographic parameters of left ventricular size and function as predictors of symptomatic heart failure in patients with a left ventricular ejection fraction of 50-59% treated with anthracyclines. <i>Eur Heart J Cardiovasc Imaging.</i> 2015;16(9):977-984. | Outcome other than CTRCD  |
| 16 | Murbraech K, et al. Impaired Right Ventricular Function in Long-Term Lymphoma Survivors. <i>J Am Soc Echocardiogr.</i> 2016;29(6):528-536.                                                                                                                                              | No LV GLS                 |
| 17 | Narayan HK, et al. Detailed Echocardiographic Phenotyping in Breast Cancer Patients: Associations with Ejection Fraction Decline, Recovery, and Heart Failure Symptoms over 3 Years of Follow-Up. <i>Circulation.</i> 2017;135(15):1397-1412.                                           | No CTRCD definition       |
| 18 | Narayan V, et al. Prospective evaluation of sunitinib-induced cardiotoxicity in patients with metastatic renal cell carcinoma. <i>Clin Cancer Res.</i> 2017;23(14):3601-3609.                                                                                                           | No LV GLS                 |
| 19 | Negishi K, et al. Use of speckle strain to assess left ventricular responses to cardiotoxic chemotherapy and cardioprotection. <i>Eur Heart J Cardiovasc Imaging.</i> 2014;15(3):324-331.                                                                                               | No CTRCD definition       |
| 20 | Poterucha JT, et al. Changes in left ventricular longitudinal strain with anthracycline chemotherapy in adolescents precede subsequent decreased left ventricular ejection fraction. <i>J Am Soc Echocardiogr.</i> 2012;25(7):733-740.                                                  | No CTRCD definition       |
| 21 | Rhea IB, et al. Incremental prognostic value of echocardiographic strain and its association with mortality in cancer patients. <i>J Am Soc Echocardiogr.</i> 2015;28(6):667-673.                                                                                                       | Outcome other than CTRCD  |

|                                                                                                        |                                                                                                                                                                                                                                                                                                     |                                   |
|--------------------------------------------------------------------------------------------------------|-----------------------------------------------------------------------------------------------------------------------------------------------------------------------------------------------------------------------------------------------------------------------------------------------------|-----------------------------------|
| 22                                                                                                     | Santoro C, et al. 2D and 3D strain for detection of subclinical anthracycline cardiotoxicity in breast cancer patients: A balance with feasibility. <i>Eur Heart J Cardiovasc Imaging</i> . 2017;18(8):930-936.                                                                                     | No CTRCD definition               |
| 23                                                                                                     | Stoodley PW, et al. Left ventricular systolic function in HER2/neu negative breast cancer patients treated with anthracycline chemotherapy: a comparative analysis of left ventricular ejection fraction and myocardial strain imaging over 12 months. <i>Eur J Cancer</i> . 2013;49(16):3396-3403. | No CTRCD definition               |
| 24                                                                                                     | Stoodley PW, et al. Two-dimensional myocardial strain imaging detects changes in left ventricular systolic function immediately after anthracycline chemotherapy. <i>Eur J Echocardiogr</i> . 2011;12(12):945-952.                                                                                  | No longitudinal follow-up         |
| 25                                                                                                     | Thavendiranathan P, et al. Single Versus Standard Multiview Assessment of Global Longitudinal Strain for the Diagnosis of Cardiotoxicity During Cancer Therapy. <i>JACC Cardiovasc Imaging</i> . 2018.                                                                                              | GLS used to define cardiotoxicity |
| 26                                                                                                     | Toro-Salazar OH, et al. Feasibility of Echocardiographic Techniques to Detect Subclinical Cancer Therapeutics-Related Cardiac Dysfunction among High-Dose Patients When Compared with Cardiac Magnetic Resonance Imaging. <i>J Am Soc Echocardiogr</i> . 2016;29(2):119-131.                        | No longitudinal follow-up         |
| 27                                                                                                     | Toufan M, et al. Two-dimensional strain echocardiography for detection of cardiotoxicity in breast cancer patients undergoing chemotherapy. <i>J Cardiovasc Thorac Res</i> . 2017;9(1):29-34.                                                                                                       | GLS used to define cardiotoxicity |
| 28                                                                                                     | Tuohinen SS, et al. Detection of early radiotherapy-induced changes in intrinsic myocardial contractility by ultrasound tissue characterization in patients with early-stage breast cancer. <i>Echocardiography</i> . 2017;34(2):191-198.                                                           | Radiotoxicity                     |
| 29                                                                                                     | Ylänen K, et al. Three-dimensional echocardiography and cardiac magnetic resonance imaging in the screening of long-term survivors of childhood cancer after cardiotoxic therapy. <i>Am J Cardiol</i> . 2014;113(11):1886-1892.                                                                     | No longitudinal follow-up         |
| 30                                                                                                     | Zhang KW, et al. Abnormalities in 3-Dimensional Left Ventricular Mechanics With Anthracycline Chemotherapy Are Associated With Systolic and Diastolic Dysfunction. <i>JACC Cardiovasc Imaging</i> . 2018.                                                                                           | No CTRCD definition               |
| CTRCD: cancer therapy-related cardiac dysfunction; LV GLS: left ventricular global longitudinal strain |                                                                                                                                                                                                                                                                                                     |                                   |

**eTable 2.** Summary clinical characteristics of the included study populations

| Study ID #                                                                     | Author (year)                             | Study size (n) | Age (years) | Female sex (%) | Radiotherapy (%) | Diabetes mellitus (%) | Hypertension (%) | Dyslipidemia (%) | Tobacco use (%) | ACEI/ARB (%) | Beta-blockers (%) | Statins (%) |
|--------------------------------------------------------------------------------|-------------------------------------------|----------------|-------------|----------------|------------------|-----------------------|------------------|------------------|-----------------|--------------|-------------------|-------------|
| <b><u>Studies examining the value of absolute or relative GLS cut-offs</u></b> |                                           |                |             |                |                  |                       |                  |                  |                 |              |                   |             |
| 1                                                                              | Baratta et al. (2013) <sup>1</sup>        | 36             | 47 (mean)   | 41.7           | 16.7             | 5.6                   | 25               | 19.4             | 41.7            | 19.4         | -                 | -           |
| 2                                                                              | Charbonnel et al. (2017) <sup>2</sup>     | 86             | 48 [30-64]  | 36             | 15               | 2                     | 15               | 9                | 23              | 8            | 7                 | 6           |
| 3                                                                              | Gripp et al. (2018) <sup>3</sup>          | 49             | 50 (mean)   | 100            | 53.1             | 4.1                   | 32.7             | -                | -               | -            | -                 | 6.1         |
| 4                                                                              | Fallah-Rad et al. (2011) <sup>4</sup>     | 42             | 47±9        | 100            | 98               | 14                    | 12               | 36               | 17              | -            | -                 | -           |
| 5                                                                              | Florescu et al. (2014) <sup>5</sup>       | 40             | 51±8        | 100            | -                | 0                     | 0                | 14               | 28              | -            | -                 | -           |
| 6                                                                              | Guerra et al. (2016) <sup>6</sup>         | 69             | 56±13       | 96             | -                | 6                     | 42               | 19               | 16              | 26           | 20                | 10          |
| 7                                                                              | Kang et al. (2013) <sup>7</sup>           | 75             | 54±14       | 45.3           | -                | 4                     | 13.3             | -                | 29.3            | 9.3          | 10.7              | -           |
| 8                                                                              | Milks et al. (2018) <sup>8</sup>          | 183            | 51±11       | 100            | 63.9             | 8.2                   | 31.7             | 18.6             | 27.9            | 21.3         | 14.2              | 12.6        |
| 9                                                                              | Mornos et al. (2013) <sup>9</sup>         | 74             | 51±11       | 58.1           | -                | 4                     | 14.8             | 10.8             | 20.2            | -            | 0                 | -           |
| 10                                                                             | Mornos et al. (2014) <sup>10</sup>        | 59             | 51±10       | 59.3           | -                | 1.6                   | 11.8             | 6.7              | 16.9            | -            | 0                 | -           |
| 11                                                                             | Negishi et al. (2013) <sup>11</sup>       | 81             | 50±11       | 10             | 62               | 7                     | 21               | 16               | 15              | -            | 0                 | -           |
| 12                                                                             | Paraskevaidis et al. (2017) <sup>12</sup> | 80             | 45±11       | 45             | -                | -                     | 15               | 10               | 20              | 15           | 10                | 9           |
| 13                                                                             | Portugal et al. (2017) <sup>13</sup>      | 158            | 55±13       | 100            | 16.5             | -                     | -                | -                | -               | -            | -                 | -           |
| 14                                                                             | Sawaya et al. (2012) <sup>14</sup>        | 81             | 50±18       | 100            | 60               | 1                     | 32               | 22               | 7               | 17           | 11                | -           |
| 15                                                                             | Sawaya et al. (2011) <sup>15</sup>        | 43             | 49 (mean)   | 100            | 11.6             | 2.3                   | 27.9             | 18.6             | 14              | 9.3          | 7                 | -           |
| 16                                                                             | Tang et al. (2016) <sup>16</sup>          | 86             | 49±8        | 100            | 19               | 6                     | 13               | 19               | 9               | -            | 0                 | -           |
| <b><u>Studies with no GLS cut-offs identified or examined</u></b>              |                                           |                |             |                |                  |                       |                  |                  |                 |              |                   |             |
| 17                                                                             | Fei et al. (2016) <sup>17</sup>           | 95             | 47±11       | 100            | 81               | 0                     | 16               | 12               | 5               | 3            | 5                 | 5           |
| 18                                                                             | Lorenzini et al. (2013) <sup>18</sup>     | 65             | 53±11       | -              | -                | -                     | -                | -                | -               | -            | -                 | -           |
| 19                                                                             | Narayan et al. (2016) <sup>19</sup>       | 135            | 48 [41-57]  | 100            | 67               | 8                     | 27               | 17               | 43              | 8            | 7                 | 6           |
| 20                                                                             | Narayan et al. (2017) <sup>20</sup>       | 165            | 53±13       | 77             | 0.6              | 11                    | 32               | 20               | 42              | 14           | 23                | 18          |
| 21                                                                             | Shaikh et al. (2016) <sup>21</sup>        | 80             | 62          | 45             | -                | 26                    | 53               | 44               | -               | 29           | 31                | 30          |

ACEi: angiotensin-converting enzyme inhibitor; ARB: angiotensin-II-receptor blocker. Data presented as percentages for categorical variables and either mean ± standard deviation or median [interquartile range] for continuous variables (i.e. age).

**eTable 3.** Prognostic and discriminatory value of continuous GLS for chemotherapy-induced cardiotoxicity

| Study                                                                                                                                                                                                                                                                                                                                                                                                                                                                                                                                      | Univariate AUC (95% CI)       | Unadjusted OR/HR (95% CI)        | Adjusted OR/HR (95% CI)          | Covariates (if adjusted models)                                               |
|--------------------------------------------------------------------------------------------------------------------------------------------------------------------------------------------------------------------------------------------------------------------------------------------------------------------------------------------------------------------------------------------------------------------------------------------------------------------------------------------------------------------------------------------|-------------------------------|----------------------------------|----------------------------------|-------------------------------------------------------------------------------|
| <b>A) Absolute pre-treatment GLS</b>                                                                                                                                                                                                                                                                                                                                                                                                                                                                                                       |                               |                                  |                                  |                                                                               |
| Narayan et al. (2016) <sup>19</sup>                                                                                                                                                                                                                                                                                                                                                                                                                                                                                                        | -                             | -                                | OR 1.25 (0.89-1.75)              | age, race, heart rate, DM, HTN, HLD, ACEi/ARB/BB use, regimen, echo timepoint |
| Narayan et al. (2017) <sup>20</sup>                                                                                                                                                                                                                                                                                                                                                                                                                                                                                                        | -                             | -                                | OR 1.09 (0.86-1.38)              | age and sex                                                                   |
| Milks et al. (2018) <sup>8</sup>                                                                                                                                                                                                                                                                                                                                                                                                                                                                                                           | -                             | -                                | OR 1.48 (1.15-1.89)              | renal failure, BB use, trastuzumab therapy, age, ANT dose, post-treatment GLS |
| Charbonnel et al. (2017) <sup>2</sup>                                                                                                                                                                                                                                                                                                                                                                                                                                                                                                      | 0.76 (0.58-0.88)              | -                                | -                                | -                                                                             |
| <b>B) Absolute on-treatment GLS</b>                                                                                                                                                                                                                                                                                                                                                                                                                                                                                                        |                               |                                  |                                  |                                                                               |
| Milks et al. (2018) <sup>8</sup>                                                                                                                                                                                                                                                                                                                                                                                                                                                                                                           | -                             | -                                | OR 1.71 (1.26-2.33)              | renal failure, BB use, trastuzumab therapy, age, ANT dose, post-treatment GLS |
| Gripp et al. (2018) <sup>3</sup>                                                                                                                                                                                                                                                                                                                                                                                                                                                                                                           | 0.95 (0.87-1.00)              | HR 2.77 (1.39-5.54)              | HR 4.10 (1.07-15.72)             | LAVi, LVEF                                                                    |
| Fei et al. (2016) <sup>17</sup>                                                                                                                                                                                                                                                                                                                                                                                                                                                                                                            | -                             | OR 1.75 (1.36-2.29)              | OR 1.63 (1.26-2.14)              | LVEF, LVEDVI                                                                  |
| Lorenzini et al. (2013) <sup>18</sup>                                                                                                                                                                                                                                                                                                                                                                                                                                                                                                      | -                             | -                                | OR 1.33 (1.13-1.57)              | LVEF                                                                          |
| Charbonnel et al. (2017) <sup>2</sup>                                                                                                                                                                                                                                                                                                                                                                                                                                                                                                      | 0.82 (0.52-0.997)             | -                                | -                                | -                                                                             |
| Guerra et al. (2016) <sup>6</sup>                                                                                                                                                                                                                                                                                                                                                                                                                                                                                                          | 0.93 (N/A)                    | -                                | -                                | -                                                                             |
| Negishi et al. (2013) <sup>11</sup>                                                                                                                                                                                                                                                                                                                                                                                                                                                                                                        | 0.67 (N/A)                    | -                                | -                                | -                                                                             |
| Paraskevaidis et al. (2017) <sup>12</sup>                                                                                                                                                                                                                                                                                                                                                                                                                                                                                                  | 0.86 (0.76-0.96)              | -                                | -                                | -                                                                             |
| Tang et al. (2016) <sup>16</sup>                                                                                                                                                                                                                                                                                                                                                                                                                                                                                                           | 0.90 (N/A)                    | -                                | -                                | -                                                                             |
| <b>C) ΔGLS (absolute difference in %)</b>                                                                                                                                                                                                                                                                                                                                                                                                                                                                                                  |                               |                                  |                                  |                                                                               |
| Mornos et al. (2013) <sup>9</sup>                                                                                                                                                                                                                                                                                                                                                                                                                                                                                                          | 0.84 (0.84-0.94)              | OR 3.98 (1.68-9.40)              | -                                | -                                                                             |
| Narayan et al. (2016) <sup>19</sup>                                                                                                                                                                                                                                                                                                                                                                                                                                                                                                        | 0.61 (0.45-0.70) <sup>a</sup> | -                                | OR 1.25 (1.01-1.53)              | age, race, heart rate, DM, HTN, HLD, ACEi/ARB/BB use, regimen, echo timepoint |
| Narayan et al. (2017) <sup>20</sup>                                                                                                                                                                                                                                                                                                                                                                                                                                                                                                        | -                             | -                                | OR 1.18 (0.95-1.47)              | age & sex                                                                     |
| Shaikh et al. (2016) <sup>21</sup>                                                                                                                                                                                                                                                                                                                                                                                                                                                                                                         | -                             | OR 0.94 (0.84-1.05) <sup>a</sup> | OR 0.94 (0.84-1.05) <sup>a</sup> | age                                                                           |
| Charbonnel et al. (2017) <sup>2</sup>                                                                                                                                                                                                                                                                                                                                                                                                                                                                                                      | 0.72 (0.45-0.92)              | -                                | -                                | -                                                                             |
| <b>D) Relative change in GLS (% change)</b>                                                                                                                                                                                                                                                                                                                                                                                                                                                                                                |                               |                                  |                                  |                                                                               |
| Negishi et al. (2013) <sup>11</sup>                                                                                                                                                                                                                                                                                                                                                                                                                                                                                                        | 0.84 (N/A)                    | -                                | OR 1.11 (1.03-1.19)              | age, HTN, DM, HLD, smoking, LVEF                                              |
| Sawaya et al. (2011) <sup>15</sup>                                                                                                                                                                                                                                                                                                                                                                                                                                                                                                         | -                             | OR 1.06 (1.02-1.12)              | -                                | -                                                                             |
| Kang et al. (2013) <sup>7</sup>                                                                                                                                                                                                                                                                                                                                                                                                                                                                                                            | 0.82 (N/A)                    | OR 1.22 (1.07-1.32)              | -                                | -                                                                             |
| Mornos et al. (2014) <sup>10</sup>                                                                                                                                                                                                                                                                                                                                                                                                                                                                                                         | 0.90 (0.81-0.99)              | OR 1.65 (1.13-2.40)              | -                                | -                                                                             |
| Charbonnel et al. (2017) <sup>2</sup>                                                                                                                                                                                                                                                                                                                                                                                                                                                                                                      | 0.74 (0.48-0.94)              | -                                | -                                | -                                                                             |
| Gripp et al. (2018) <sup>3</sup>                                                                                                                                                                                                                                                                                                                                                                                                                                                                                                           | 0.97 (0.91-1.00)              | -                                | -                                | -                                                                             |
| Florescu et al. (2014) <sup>5</sup>                                                                                                                                                                                                                                                                                                                                                                                                                                                                                                        | 0.85 (0.73-0.97)              | -                                | -                                | -                                                                             |
| ACEi: angiotensin-converting enzyme inhibitor; ARB: angiotensin-II-receptor blocker; ANT: anthracycline; BB: beta-blockers; CTRCD: cancer treatment-related cardiac dysfunction; GLS: left ventricular global longitudinal strain; HLD: hyperlipidemia; HR: hazard ratio; HTN: hypertension; LAVi: left atrial volume index; LVEDVI: left ventricular end-diastolic volume index; LVEF: left ventricular ejection fraction; MACE: major adverse cardiac events; N/A: not available (not reported or cannot be calculated); OR: odds ratio. |                               |                                  |                                  |                                                                               |
| <sup>a</sup> 95% CI derived from ratios and P values based on the method proposed by Altman DG. BMJ 2011;343:d2090. <sup>22</sup>                                                                                                                                                                                                                                                                                                                                                                                                          |                               |                                  |                                  |                                                                               |



**eTable 4.** Meta-regression analysis of prognostic odds ratios for threshold GLS changes

|                                                                                                                             | <b>Absolute on-treatment GLS as a predictor of cardiotoxicity (n=9)<br/>Beta (95% CI)</b> | <b>Relative % change in GLS as a predictor of cardiotoxicity (n=9)<br/>Beta (95% CI)</b> |
|-----------------------------------------------------------------------------------------------------------------------------|-------------------------------------------------------------------------------------------|------------------------------------------------------------------------------------------|
| <b>Study size (n)</b>                                                                                                       | -0.01 (-0.02 – 0.00), P=0.13                                                              | <b>-0.02 (-0.03 – -0.01), P=0.003</b>                                                    |
| <b>Average age (years)</b>                                                                                                  | -0.03 (-0.24 – 0.17), P=0.71                                                              | -0.08 (-0.63 – 0.48), P=0.76                                                             |
| <b>Cardiotoxicity (%)</b>                                                                                                   | -0.01 (-0.10 – 0.07), P=0.71                                                              | 0.06 (-0.08 – 0.20), P=0.32                                                              |
| <b>Cutoff used (%)</b>                                                                                                      | 0.17 (-0.20 – 0.53), P=0.32                                                               | -0.04 (0.32 – 0.23), P=0.73                                                              |
| <b>Average EF at baseline (%)</b>                                                                                           | 0.13 (-0.09 – 0.35), P=0.22                                                               | 0.16 (-0.24 – 0.56), P=0.37                                                              |
| <b>Average GLS at baseline (%)</b>                                                                                          | 0.29 (-0.13 – 0.70), P=0.15                                                               | 0.37 (-0.32 – 1.05), P=0.25                                                              |
| <b>Cancer type (breast vs other)</b>                                                                                        | -0.17 (-1.92-1.57), P=0.82                                                                | -0.27 (-2.50-1.95), P=0.78                                                               |
| <b>ASE definition (versus other)</b>                                                                                        | -0.45 (-1.68 – 0.79), P=0.42                                                              | <b>-2.25 (-3.49 - -1.01), P=0.004</b>                                                    |
| ASE: American Society of Echocardiography; CI: confidence interval; EF: ejection fraction; GLS: global longitudinal strain. |                                                                                           |                                                                                          |

**eTable 5.** Quality in Prognostic Studies (QUIPS) risk of bias tool

| Study Name                                                              | 1. Study participation | 2. Study attrition | 3. Prognostic factor (GLS) measurement | 4. Outcome (CTRCD) assessment | 5. Study confounding | 6. Statistical analysis and reporting | 7. Overall risk of bias |
|-------------------------------------------------------------------------|------------------------|--------------------|----------------------------------------|-------------------------------|----------------------|---------------------------------------|-------------------------|
| <b>Studies examining the value of absolute or relative GLS cut-offs</b> |                        |                    |                                        |                               |                      |                                       |                         |
| Baratta et al. (2013) <sup>1</sup>                                      | moderate               | moderate           | moderate                               | moderate                      | high                 | moderate                              | moderate                |
| Charbonnel et al. (2017) <sup>2</sup>                                   | moderate               | moderate           | low                                    | moderate                      | high                 | high                                  | moderate                |
| Gripp et al. (2018) <sup>3</sup>                                        | moderate               | moderate           | low                                    | moderate                      | high                 | high                                  | high                    |
| Fallah-Rad et al. (2011) <sup>4</sup>                                   | moderate               | moderate           | low                                    | moderate                      | high                 | moderate                              | moderate                |
| Florescu et al. (2014) <sup>5</sup>                                     | moderate               | moderate           | moderate                               | moderate                      | high                 | high                                  | moderate                |
| Guerra et al. (2016) <sup>6</sup>                                       | moderate               | high               | low                                    | moderate                      | high                 | high                                  | high                    |
| Kang et al. (2013) <sup>7</sup>                                         | moderate               | moderate           | low                                    | moderate                      | high                 | low                                   | moderate                |
| Milks et al. (2018) <sup>8</sup>                                        | high                   | moderate           | moderate                               | high                          | low                  | low                                   | moderate                |
| Mornos et al. (2013) <sup>9</sup>                                       | moderate               | high               | moderate                               | moderate                      | high                 | high                                  | high                    |
| Mornos et al. (2014) <sup>10</sup>                                      | moderate               | high               | moderate                               | moderate                      | high                 | high                                  | high                    |
| Negishi et al. (2013) <sup>11</sup>                                     | low                    | moderate           | low                                    | moderate                      | moderate             | low                                   | moderate                |
| Paraskevaidis et al. (2017) <sup>12</sup>                               | moderate               | moderate           | low                                    | low                           | moderate             | low                                   | moderate                |
| Portugal et al. (2017) <sup>13</sup>                                    | moderate               | moderate           | low                                    | moderate                      | high                 | high                                  | moderate                |
| Sawaya et al. (2012) <sup>14</sup>                                      | moderate               | moderate           | moderate                               | moderate                      | high                 | high                                  | moderate                |
| Sawaya et al. (2011) <sup>15</sup>                                      | moderate               | moderate           | moderate                               | moderate                      | high                 | high                                  | moderate                |
| Tang et al. (2016) <sup>16</sup>                                        | high                   | moderate           | moderate                               | moderate                      | high                 | high                                  | high                    |
| <b>Studies with no GLS cut-offs identified or examined</b>              |                        |                    |                                        |                               |                      |                                       |                         |
| Fei et al. (2016) <sup>17</sup>                                         | high                   | moderate           | low                                    | moderate                      | high                 | moderate                              | moderate                |
| Lorenzini et al. (2013) <sup>18</sup>                                   | moderate               | high               | moderate                               | moderate                      | high                 | moderate                              | moderate                |
| Narayan et al. (2016) <sup>19</sup>                                     | low                    | moderate           | low                                    | moderate                      | low                  | low                                   | low                     |
| Narayan et al. (2017) <sup>20</sup>                                     | low                    | moderate           | low                                    | moderate                      | moderate             | low                                   | moderate                |
| Shaikh et al. (2016) <sup>21</sup>                                      | high                   | moderate           | low                                    | moderate                      | moderate             | low                                   | moderate                |

CTRCD: cancer therapeutics-related cardiac dysfunction; GLS: global longitudinal strain.

## eReferences.

1. Baratta S, Damiano MA, Marchese ML, et al. Serum markers, conventional Doppler echocardiography and two-dimensional systolic strain in the diagnosis of chemotherapy-induced myocardial toxicity. *Rev Argent Cardiol.* 2013;81(2):151-158.
2. Charbonnel C, Convers-Domart R, Rigaudeau S, et al. Assessment of global longitudinal strain at low-dose anthracycline-based chemotherapy, for the prediction of subsequent cardiotoxicity. *Eur Heart J Cardiovasc Imaging.* 2017;18(4):392-401.
3. Gripp EA, De Oliveira GE, Feijo LA, Garcia MI, Xavier SS, De Sousa AS. Global longitudinal strain accuracy for cardiotoxicity prediction in a cohort of breast cancer patients during anthracycline and/or trastuzumab treatment. *Arq Bras Cardiol.* 2018;110(2):140-150.
4. Fallah-Rad N, Walker JR, Wassef A, et al. The utility of cardiac biomarkers, tissue velocity and strain imaging, and cardiac magnetic resonance imaging in predicting early left ventricular dysfunction in patients with human epidermal growth factor receptor II-positive breast cancer treated with adjuvant trastuzumab therapy. *J Am Coll Cardiol.* 2011;57(22):2263-2270.
5. Florescu M, Magda LS, Enescu OA, Jinga D, Vinereanu D. Early detection of epirubicin-induced cardiotoxicity in patients with breast cancer. *J Am Soc Echocardiogr.* 2014;27(1):83-92.
6. Guerra F, Marchesini M, Contadini D, et al. Speckle-tracking global longitudinal strain as an early predictor of cardiotoxicity in breast carcinoma. *Support Care Cancer.* 2016;24(7):3139-3145.
7. Kang Y, Cheng L, Li L, et al. Early detection of anthracycline-induced cardiotoxicity using two-dimensional speckle tracking echocardiography. *Cardiol J.* 2013;20(6):592-599.
8. Milks MW, Velez MR, Mehta N, et al. Usefulness of Integrating Heart Failure Risk Factors Into Impairment of Global Longitudinal Strain to Predict Anthracycline-Related Cardiac Dysfunction. *Am J Cardiol.* 2018;121(7):867-873.
9. Mornos C, Petrescu L. Early detection of anthracycline-mediated cardiotoxicity: the value of considering both global longitudinal left ventricular strain and twist. *Can J Physiol Pharmacol.* 2013;91(8):601-607.
10. Mornos C, Manolis AJ, Cozma D, Kouremenos N, Zacharopoulou I, Ionac A. The value of left ventricular global longitudinal strain assessed by three-dimensional strain imaging in the early detection of anthracycline-mediated cardiotoxicity. *Hellenic J Cardiol.* 2014;55(3):235-244.
11. Negishi K, Negishi T, Hare JL, Haluska BA, Plana JC, Marwick TH. Independent and incremental value of deformation indices for prediction of trastuzumab-induced cardiotoxicity. *J Am Soc Echocardiogr.* 2013;26(5):493-498.
12. Paraskevaïdis IA, Makavos G, Tsirigotis P, et al. Deformation Analysis of Myocardial Layers Detects Early Cardiac Dysfunction after Chemotherapy in Bone Marrow Transplantation Patients: A Continuous and Additive Cardiotoxicity Process. *J Am Soc Echocardiogr.* 2017;30(11):1091-1102.
13. Portugal G, Moura Branco L, Galrinho A, et al. Global and regional patterns of longitudinal strain in screening for chemotherapy-induced cardiotoxicity. *Rev Port Cardiol.* 2017;36(1):9-15.

14. Sawaya H, Sebag IA, Plana JC, et al. Assessment of echocardiography and biomarkers for the extended prediction of cardiotoxicity in patients treated with anthracyclines, taxanes, and trastuzumab. *Circ Cardiovasc Imaging*. 2012;5(5):596-603.
15. Sawaya H, Sebag IA, Plana JC, et al. Early detection and prediction of cardiotoxicity in chemotherapy-treated patients. *Am J Cardiol*. 2011;107(9):1375-1380.
16. Tang Q, Jiang Y, Xu Y, Xia H. Speckle tracking echocardiography predicts early subclinical anthracycline cardiotoxicity in patients with breast cancer. *J Clin Ultrasound*. 2017;45(4):222-230.
17. Fei HW, Ali MT, Tan TC, et al. Left Ventricular Global Longitudinal Strain in HER-2 + Breast Cancer Patients Treated with Anthracyclines and Trastuzumab Who Develop Cardiotoxicity Is Associated with Subsequent Recovery of Left Ventricular Ejection Fraction. *Echocardiography*. 2016;33(4):519-526.
18. Lorenzini C, Corsi C, Aquilina M, et al. Early Detection of Cardiotoxicity in Chemotherapy-Treated Patients from Real-time 3D Echocardiography. *2013 Computing in Cardiology Conference (Cinc)*. 2013;40:249-252.
19. Narayan HK, French B, Khan AM, et al. Noninvasive Measures of Ventricular-Arterial Coupling and Circumferential Strain Predict Cancer Therapeutics-Related Cardiac Dysfunction. *JACC Cardiovasc Imaging*. 2016;9(10):1131-1141.
20. Narayan HK, Wei W, Feng Z, et al. Cardiac mechanics and dysfunction with anthracyclines in the community: results from the PREDICT study. *Open Heart*. 2017;4(1):e000524.
21. Shaikh AY, Suryadevara S, Tripathi A, et al. Mitoxantrone-Induced Cardiotoxicity in Acute Myeloid Leukemia-A Velocity Vector Imaging Analysis. *Echocardiography*. 2016;33(8):1166-1177.
22. Altman DG, Bland JM. How to obtain the confidence interval from a P value. *BMJ*. 2011;343:d2090.
